# Supplementary material for: Anti-apoptotic effects of Sonic hedgehog signalling through oxidative stress reduction in astrocytes co-cultured with excretory-secretory products of larval Angiostrongylus cantonensis
Source: PubMed Central journal article supplement (PMC5294578; doi:10.1038/srep41574), 2017-02-07
Supplement: srep41574-s1.pdf [file srep41574-s1.pdf]

## Supplementary Information

### **Anti-apoptotic effects of Sonic hedgehog signalling through oxidative stress reduction in astrocytes co-cultured with excretory-secretory products of larval *Angiostrongylus cantonensis***

Kuang-Yao Chen<sup>1</sup>, Cheng-Hsun Chiu<sup>2</sup> and Lian-Chen Wang<sup>1, 2, 3, \*</sup>

<sup>1</sup> *Department of Parasitology, College of Medicine, Chang Gung University, Taoyuan 333, Taiwan*

<sup>2</sup> *Molecular Infectious Disease Research Center, Chang Gung Memorial Hospital, Taoyuan, Taiwan;*

<sup>3</sup> *Graduate Institute of Biomedical Sciences, College of Medicine, Chang Gung University, Taoyuan 333, Taiwan*

\* Corresponding author. [wanglc@mail.cgu.edu.tw](mailto:wanglc@mail.cgu.edu.tw)

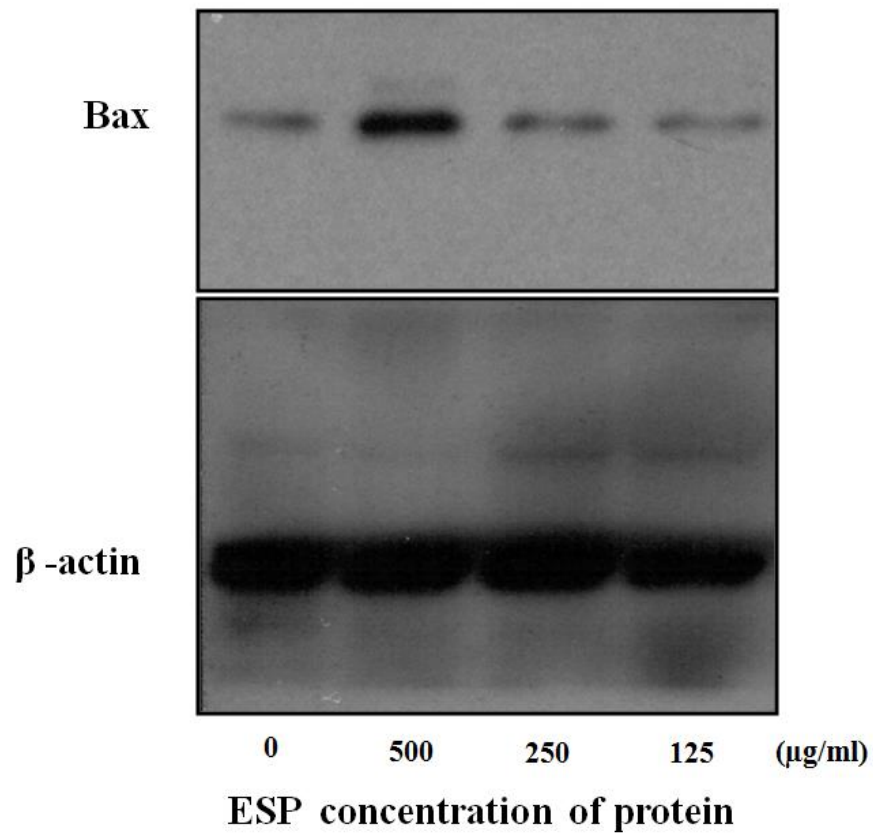

**Figure S1. Western blot analysis of Bax level in astrocytes treated with different concentrations of ESP for 4 h.  $\beta$ -actin was used as a control.**

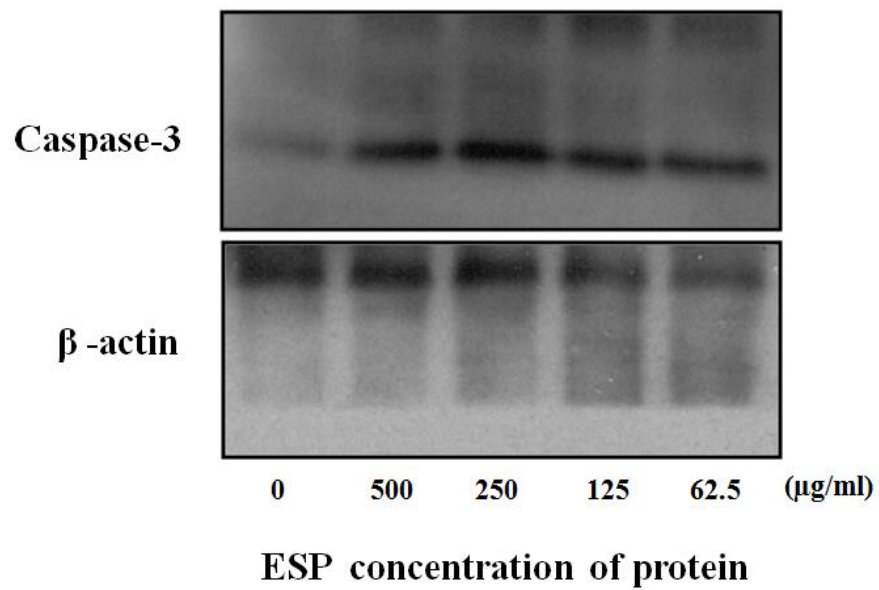

**Figure S2. Western blot analysis of Caspase-3 level in astrocytes treated with different concentrations of ESP for 4 h. β-actin was used as a control.**

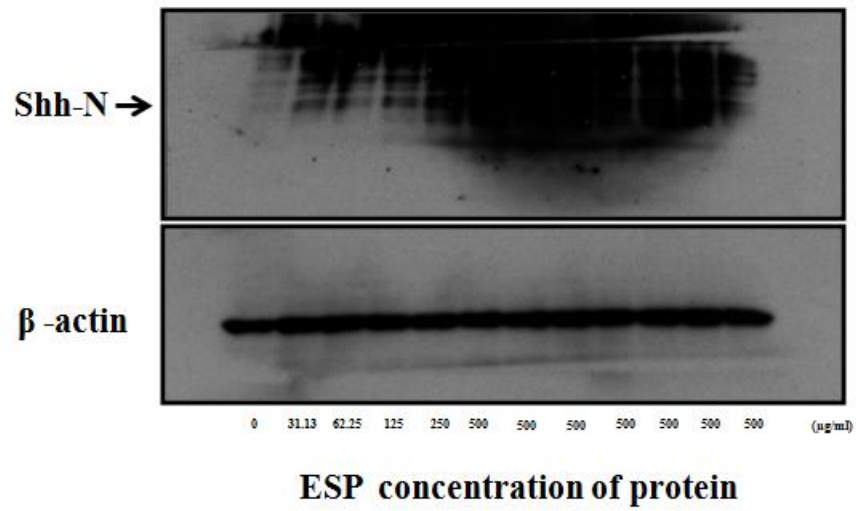

**Figure S3. Western blot analysis of Shh level in astrocytes treated with different concentrations of ESP for 4 h. β-actin was used as a control.**

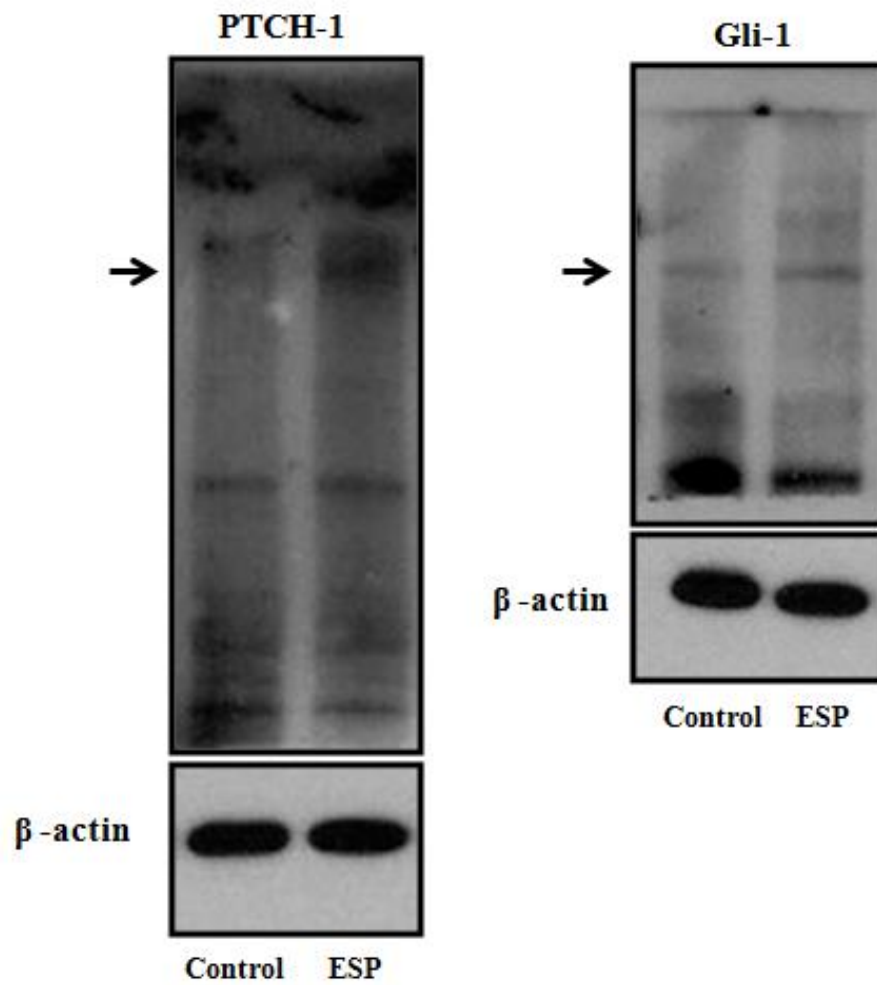

**Figure S4. Western blot analysis of PTCH-1 and Gli-1 levels in astrocytes treated with or without 500 µg/ml ESP for 4 h. β-actin was used as a control.**

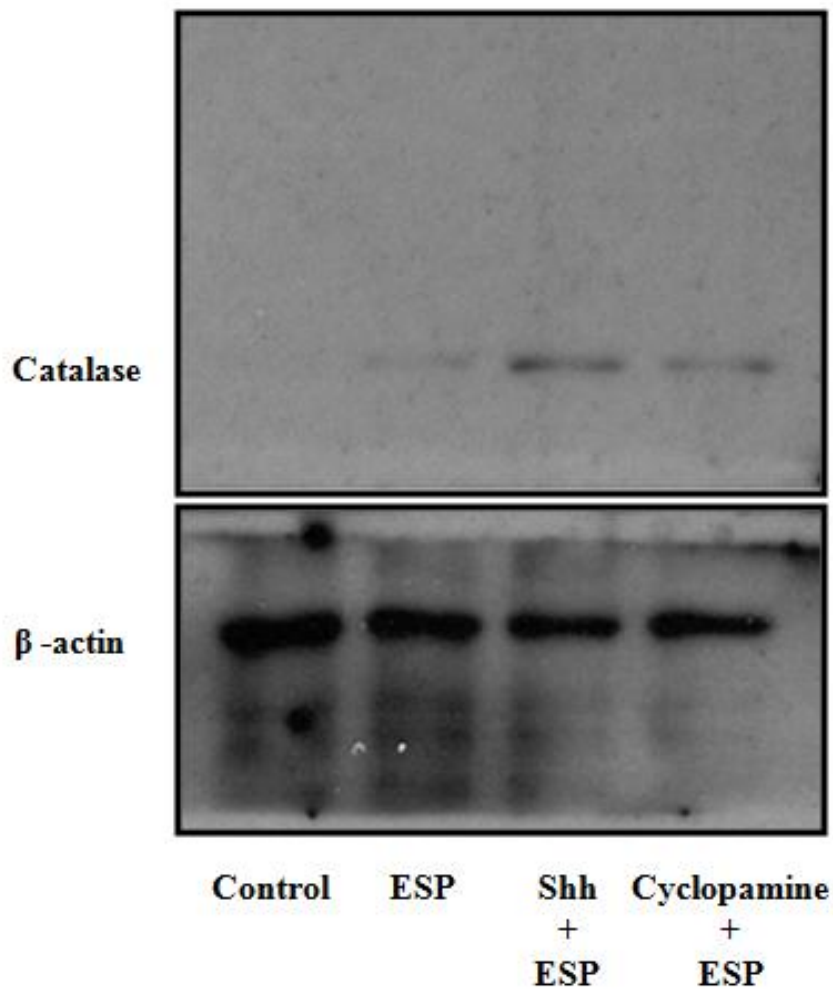

**Figure S5.** Western blot analysis on catalase in astrocytes treated with ESP alone, pre-treated with a recombinant Sonic hedgehog peptide from mouse (Shh) (3  $\mu$ g) or cyclopamine (20  $\mu$ M) for 2 h and then with 500  $\mu$ g/ml ESP for 4 h.  $\beta$ -actin was used as a control.

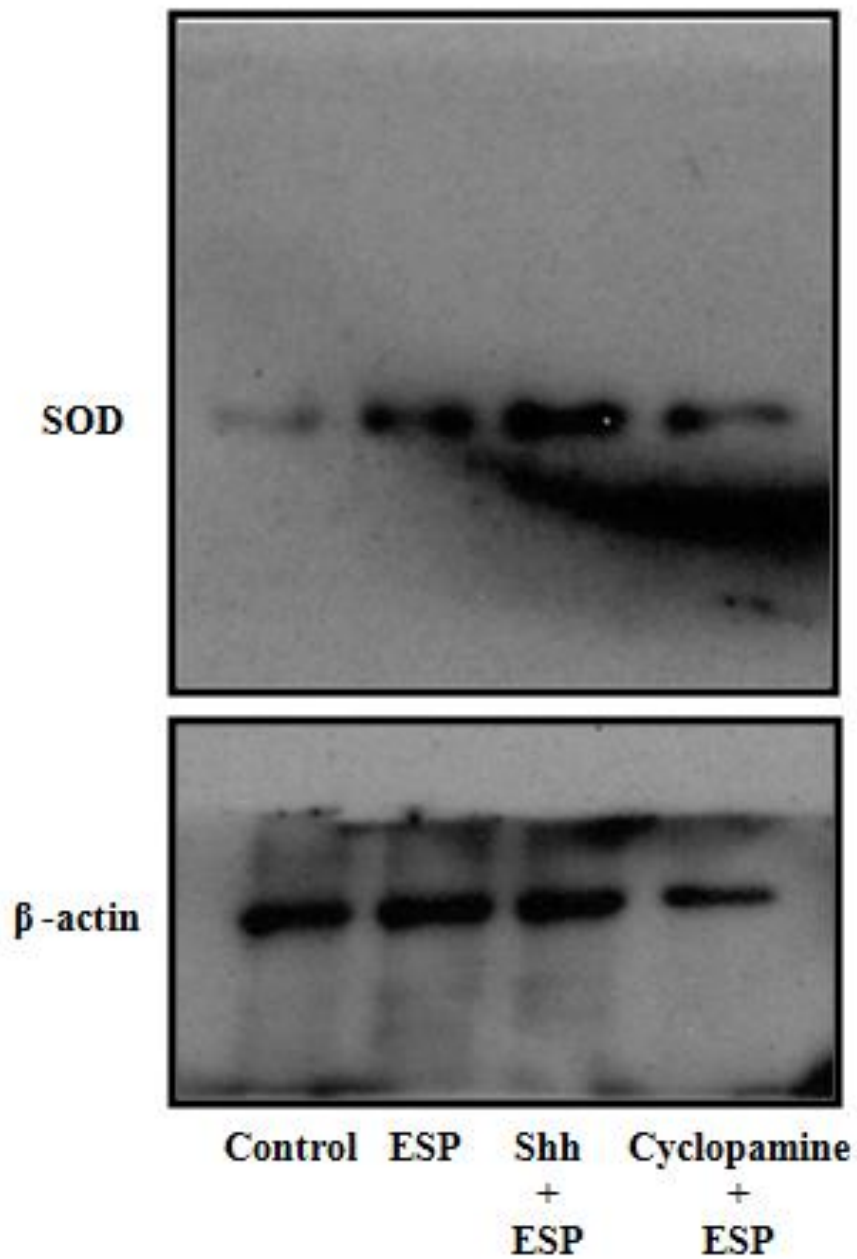

**Figure S6.** Western blot analysis on SOD in astrocytes treated with ESP alone, pre-treated with a recombinant Sonic hedgehog peptide from mouse (Shh) (3  $\mu$ g) or cyclopamine (20  $\mu$ M) for 2 h and then with 500  $\mu$ g/ml ESP for 4 h.  $\beta$ -actin was used as a control.
